# Supplementary material for: Incidental Prophylactic Appendectomy Is Associated with a Profound Microbial Dysbiosis in the Long-Term
Source: MDPI journal article supplement (doi:10.3390/microorganisms8040609), 2020-04-23
Supplement: s1 [file s1]

**preSurgery**  
2004-2008

**studyTime**  
2016

**w/oApp**

**Intact**

**w/oApp**

**Intact**

Anthropometric  
and biochemical  
variables

Anthropometric  
and biochemical  
variables

Anthropometric  
and biochemical  
variables

Anthropometric  
and biochemical  
variables

Appendix tissue

Feces

Feces
